# Supplementary material for: Critical Review of Plant-Derived Compounds as Possible Inhibitors of SARS-CoV-2 Proteases: A Comparison with Experimentally Validated Molecules
Source: PubMed Central journal article supplement — ACS Omega. 2022 Dec 2;7(49):44542–55. doi: 10.1021/acsomega.2c05766 (PMC9753184; doi:10.1021/acsomega.2c05766), 2022-12-02
Supplement: ao2c05766_si_001.pdf [file ao2c05766_si_001.pdf]

## **Critical review of plant-derived compounds as possible inhibitors of SARS-Cov2 proteases: a comparison with experimentally validated molecules**

Yasel Guerra, Diana Celi, Paul Cueva, Yunierkis Perez-Castillo, Francesca Giampieri, José Miguel Alvarez-Suarez\* and Eduardo Tejera\*

### **Corresponding Authors**

**Eduardo Tejera** - Ingeniería en Biotecnología, Facultad de Ingeniería y Ciencias Aplicadas. Universidad de Las Américas, Quito 170125, Ecuador; Grupo de Bio-Quimioinformática. Universidad de Las Américas, Quito 170125, Ecuador. <https://orcid.org/0000-0002-1377-0413>; Email: eduardo.tejera@udla.edu.ec

**José Miguel Alvarez-Suarez** - Departamento de Ingeniería en Alimentos. Colegio de Ciencias e Ingenierías, Universidad San Francisco de Quito, Quito 170157, Ecuador; King Fahd Medical Research Center, King Abdulaziz University, Jeddah 21589, Saudi Arabia. <https://orcid.org/0000-0001-8509-1498>; Email: jalvarez@usfq.edu.ec

### **Other Authors**

**Yasel Guerra** - Ingeniería en Biotecnología, Facultad de Ingeniería y Ciencias Aplicadas. Universidad de Las Américas, Quito 170125, Ecuador; Grupo de Bio-Quimioinformática. Universidad de Las Américas, Quito 170125, Ecuador

**Diana Celi** - Facultad de Ingeniería y Ciencias Aplicadas. Universidad de Las Américas, Quito 170125, Ecuador.

**Paul Cueva** - Facultad de Posgrado, Universidad de Las Américas, Quito 170125, Ecuador

**Yunierkis Pérez-Castillo** – Área de Ciencias Aplicadas, Facultad de Ingeniería y Ciencias Aplicadas. Universidad de Las Américas, Quito 170125, Ecuador; Grupo de Bio-Quimioinformática. Universidad de Las Américas, Quito 170125, Ecuador

**Francesca Giampieri** - Department of Biochemistry, Faculty of Sciences, King Abdulaziz University, Jeddah 21589, Saudi Arabia; Research Group on Food, Nutritional Biochemistry and Health, Universidad Europea del Atlántico, Santander 39011, Spain

## Common fragments in the 648 predicted molecules.

The fragment analysis of all the unique molecules using Recap generates a total of 1042 different fragments (the full list can be seen in Supplementary Material 1B). Because of the large number of fragments (and the wide chemical diversity) we included the top frequent fragments (with more than 4 non-hydrogen atoms and from 0.25 to 24% of abundance) in Figure S1. The fragments were arranged in groups and we can easily identify the fragments related to: gallic and caffeic acids (Group I, Group II, Group V), fragments or even portions of the double ring fragments which are associated with the molecules with higher evidence (quercetin, luteolin, kaempferol, etc) (Group I and Group IX). We also found several monosaccharides, disaccharides and glucuronic fragments which are consistent with glycosylated flavonoids (Group III). On the other hand, we found fragments present in molecules like piperine, coumapherine, piperundecalidi and quinic acids and different aliphatic substituents commonly found in the dataset.

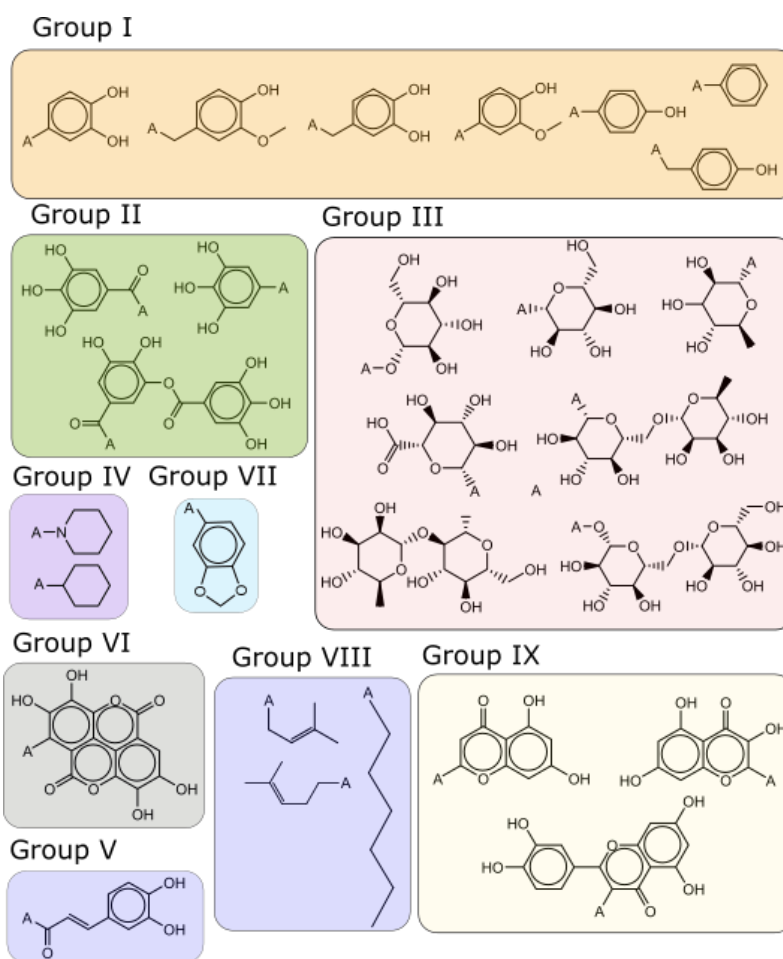

Figure S1. Top frequent fragments identified in all unique molecules.
